# Supplementary material
Source: PubMed Central journal article supplement (PMC1963504)
Supplement: pcbi.0030148.st004.pdf [file pcbi.0030148.st004.pdf]

**Table S4:** Summary of selected Gene Ontology (GO) biological process categories or Kyoto Encyclopedia of Genes and Genomes (KEGG) pathways for which expression programs discovered in the infection time-series data are significantly enriched. As expected, many significant GO categories and KEGG pathways were specifically involved with response to infection. Interestingly, a substantial number of significant categories or pathways corresponded to signaling cascades. Further, there were also a number of significantly enriched biological processes or pathways not directly labeled as being infection-related, but that are involved with alterations in cellular physiology consistent with infection. Finally, there were some unexpected significant categories or pathways.

| <b>Infection response</b>                                                                                                                                                                                                                                                                                                                                                                                                                                                                                                                                                            | <b>Signaling pathways</b>                                                                                                                                                                                                                                                                                                                                                                                                                                                                                                                                                                                                  | <b>Other</b>                                                                                                                                                                                                                                                                                                                                                                                                                                                                                                                                                                                                                                                                                                                                                                                                                                                                                                                                                                                                                     |
|--------------------------------------------------------------------------------------------------------------------------------------------------------------------------------------------------------------------------------------------------------------------------------------------------------------------------------------------------------------------------------------------------------------------------------------------------------------------------------------------------------------------------------------------------------------------------------------|----------------------------------------------------------------------------------------------------------------------------------------------------------------------------------------------------------------------------------------------------------------------------------------------------------------------------------------------------------------------------------------------------------------------------------------------------------------------------------------------------------------------------------------------------------------------------------------------------------------------------|----------------------------------------------------------------------------------------------------------------------------------------------------------------------------------------------------------------------------------------------------------------------------------------------------------------------------------------------------------------------------------------------------------------------------------------------------------------------------------------------------------------------------------------------------------------------------------------------------------------------------------------------------------------------------------------------------------------------------------------------------------------------------------------------------------------------------------------------------------------------------------------------------------------------------------------------------------------------------------------------------------------------------------|
| <ul style="list-style-type: none"> <li>- Inflammatory response (GO:0006954)</li> <li>- Response to virus (GO:0009615)</li> <li>- Chemotaxis (GO:0006935)</li> <li>- Positive regulation of T-cell proliferation (GO:0042102)</li> <li>- Endogenous antigen processing via MHC class II (GO:0019886)</li> <li>- Cytokine-cytokine receptor interaction (KEGG:hsa04060)</li> <li>- Natural killer cell mediated cytotoxicity (KEGG:hsa04650)</li> <li>- Leukocyte transendothelial migration (KEGG:hsa04670)</li> <li>- Complement and coagulation cascades (KEGG:hsa04610)</li> </ul> | <ul style="list-style-type: none"> <li>- MAPKKK (GO:0000165 and KEGG:hsa04010)</li> <li>- JAK-STAT (GO:0007259 and KEGG:hsa04630)</li> <li>- Toll-like receptor (KEGG:hsa04620)</li> <li>- B-cell receptor (KEGG:hsa04662)</li> <li>- T-cell receptor (KEGG:hsa04660)</li> <li>- Insulin (KEGG:hsa04910)</li> <li>- VEGF (KEGG:hsa04370)</li> <li>- Calcium (KEGG:hsa04020)</li> <li>- Wnt (KEGG:hsa04310)</li> <li>- Phosphatidylinositol (KEGG:hsa04070)</li> <li>- I-<math>\kappa</math>B kinase/NF-<math>\kappa</math>B (GO:0043123)</li> <li>- Transmembrane receptor protein tyrosine kinase (GO:0007169)</li> </ul> | <ul style="list-style-type: none"> <li>- Apoptosis (GO:0006915)</li> <li>- Nucleotide-excision repair (GO:0006289)</li> <li>- Nuclear mRNA splicing (GO:0000398)</li> <li>- Glycolysis (GO:0006096)</li> <li>- Glycogen metabolism (GO:0005977)</li> <li>- Anti-apoptosis (GO:0006916)</li> <li>- Cell cycle (GO:00070490)</li> <li>- Positive regulation of cell proliferation (GO:0008284)</li> <li>- Tricarboxylic acid cycle (GO:000609)</li> <li>- Regulation of adenylate cyclase activity (GO:0045761)</li> <li>- Chloride transport (GO:0006821)</li> <li>- Focal adhesion (KEGG:hsa04510)</li> <li>- Oxidative phosphorylation (KEGG:hsa00190)</li> <li>- Proteasome (KEGG:hsa03050)</li> <li>- Androgen and estrogen metabolism (KEGG:hsa00150)</li> <li>- Regulation of actin cytoskeleton (KEGG:hsa04810)</li> <li>- Gap junction (KEGG:hsa04540)</li> <li>- Fatty acid metabolism (KEGG:hsa00071)</li> <li>- Ribosome (KEGG:hsa03010)</li> <li>- Neuroactive ligand-receptor interaction (KEGG:hsa04080)</li> </ul> |
