# Supplementary material
Source: PubMed Central journal article supplement (PMC1963504)
Supplement: pcbi.0030148.st006.pdf [file pcbi.0030148.st006.pdf]

**Table S6:** Manual classification of Novartis Gene Atlas v2 tissue samples into 10 high-level, physiologically based categories.

| <b>Category</b>                           | <b>Tissues</b>                                                                                                                                                                                                                                                                                                                                                                                                                                                                                                                                                                                                                                                                                                                        |
|-------------------------------------------|---------------------------------------------------------------------------------------------------------------------------------------------------------------------------------------------------------------------------------------------------------------------------------------------------------------------------------------------------------------------------------------------------------------------------------------------------------------------------------------------------------------------------------------------------------------------------------------------------------------------------------------------------------------------------------------------------------------------------------------|
| Neural                                    | h_Amygdala, h_DRG, h_Hypothalamus, h_OlfactoryBulb, h_TrigeminalGanglion, h_cerebellum, h_spinalcord, h_TemporalLobe, h_globuspallidus, h_CerebellumPeduncles, h_caudatenucleus, h_WholeBrain, h_ParietalLobe, h_MedullaOblongata, h_PrefrontalCortex, h_OccipitalLobe, h_Thalamus, h_subthalamicnucleus, h_CingulateCortex, h_Pons, h_fetalbrain, h_ciliaryganglion, h_atrioventricularnode, h_SuperiorCervicalGanglion, m_amygdala, m_dorsal root ganglia, m_hypothalamus, m_olfactory bulb, m_trigeminal, m_cerebellum, m_spinal cord lower, m_substantia nigra, m_spinal cord upper, m_preoptic, m_frontal cortex, m_cerebral cortex, m_dorsal striatum, m_hippocampus, m_eye, m_medial olfactory epithelium, m_vomerlnasal organ |
| Muscle                                    | h_Heart, h_SkeletalMuscle, h_TONGUE, h_CardiacMyocytes, h_SmoothMuscle, m_heart, m_skeletal muscle, m_tongue                                                                                                                                                                                                                                                                                                                                                                                                                                                                                                                                                                                                                          |
| Hematological/Immune                      | h_PB-CD4+Tcells, h_PB-CD8+Tcells, h_bonemarrow, h_lymphnode, h_thymus, h_WHOLEBLOOD, h_BM-CD33+Myeloid, h_PB-CD14+Monocytes, h_PB-BDCA4+Dendritic_Cells, h_PB-CD56+NKCells, h_PB-CD19+Bcells, h_BM-CD105+Endothelial, h_BM-CD34+, h_Tonsil, h_BM-CD71+EarlyErythroid, m_CD4+T-cells, m_CD8+T-cells, m_bone marrow, m_lymph node, m_thymus, m_bone, m_spleen, m_B220+ B-cells                                                                                                                                                                                                                                                                                                                                                          |
| Malignant                                 | h_ColorectalAdenocarcinoma, h_leukemialymphoblastic(molt4), h_721_B_lymphoblasts, h_lymphomaburkittsRaji, h_leukemiapromyelocytic(hl60), h_lymphomaburkittsDaudi, h_leukemiachronicmyelogenous(k562)                                                                                                                                                                                                                                                                                                                                                                                                                                                                                                                                  |
| Respiratory                               | h_Lung, h_fetallung, h_bronchialepithelialcells, m_lung, h_trachea, m_trachea                                                                                                                                                                                                                                                                                                                                                                                                                                                                                                                                                                                                                                                         |
| Renal                                     | h_kidney, m_kidney, m_bladder                                                                                                                                                                                                                                                                                                                                                                                                                                                                                                                                                                                                                                                                                                         |
| Endocrine                                 | h_Thyroid, h_adrenalgland, h_fetalThyroid, h_PancreaticIslets, h_AdrenalCortex, m_pituitary, m_thyroid, m_adrenal gland, h_Pituitary                                                                                                                                                                                                                                                                                                                                                                                                                                                                                                                                                                                                  |
| Reproductive/embryological                | h_Ovary, h_PLACENTA, h_Uterus, h_testis, h_TestisLeydigCell, h_TestisGermCell, h_TestisInterstitial, h_TestisSeminiferousTubule, h_UterusCorpus, m_ovary, m_placenta, m_uterus, m_testis, m_embryo day 10.5, m_embryo day 9.5, m_embryo day 8.5, m_embryo day 7.5, m_embryo day 6.5, m_umbilical cord, m_mammary gland (lact), m_blastocysts, m_fertilized egg, m_oocyte, h_Prostate, m_prostate                                                                                                                                                                                                                                                                                                                                      |
| Digestion/nutrient processing and storage | h_Liver, h_Pancreas, h_salivarygland, h_fetalliver, h_Appendix, m_liver, m_pancreas, m_salivary gland, m_stomach, m_large intestine, m_small intestine, h_ADIPOCYTE, m_adipose tissue, m_brown fat                                                                                                                                                                                                                                                                                                                                                                                                                                                                                                                                    |
| Epidermis                                 | h_skin, m_epidermis, m_digits, m_snout epidermis                                                                                                                                                                                                                                                                                                                                                                                                                                                                                                                                                                                                                                                                                      |
